# Supplementary material for: Evidence-based framework to use in situ phycocyanin readings for cyanobacterial risk assessment within drinking water treatment plants
Source: Royal Society of Chemistry journal article supplement (doi:10.1039/d3ew00922j), 2024-01-01
Supplement: d3ew00922j1.pdf [file d3ew00922j1.pdf]

# **Evidence-based framework to use *in situ* phycocyanin readings for cyanobacterial risk assessment within drinking water treatment plants**

Liya Ma <sup>\*</sup>, Sarah Dorner, and Michèle Prévost

Department of Civil, Geological, and Mining Engineering, Polytechnique Montréal, Montréal, QC  
H3C 3A7, Canada

\* Correspondence: [liya.ma@polymtl.ca](mailto:liya.ma@polymtl.ca)

## Supplementary materials

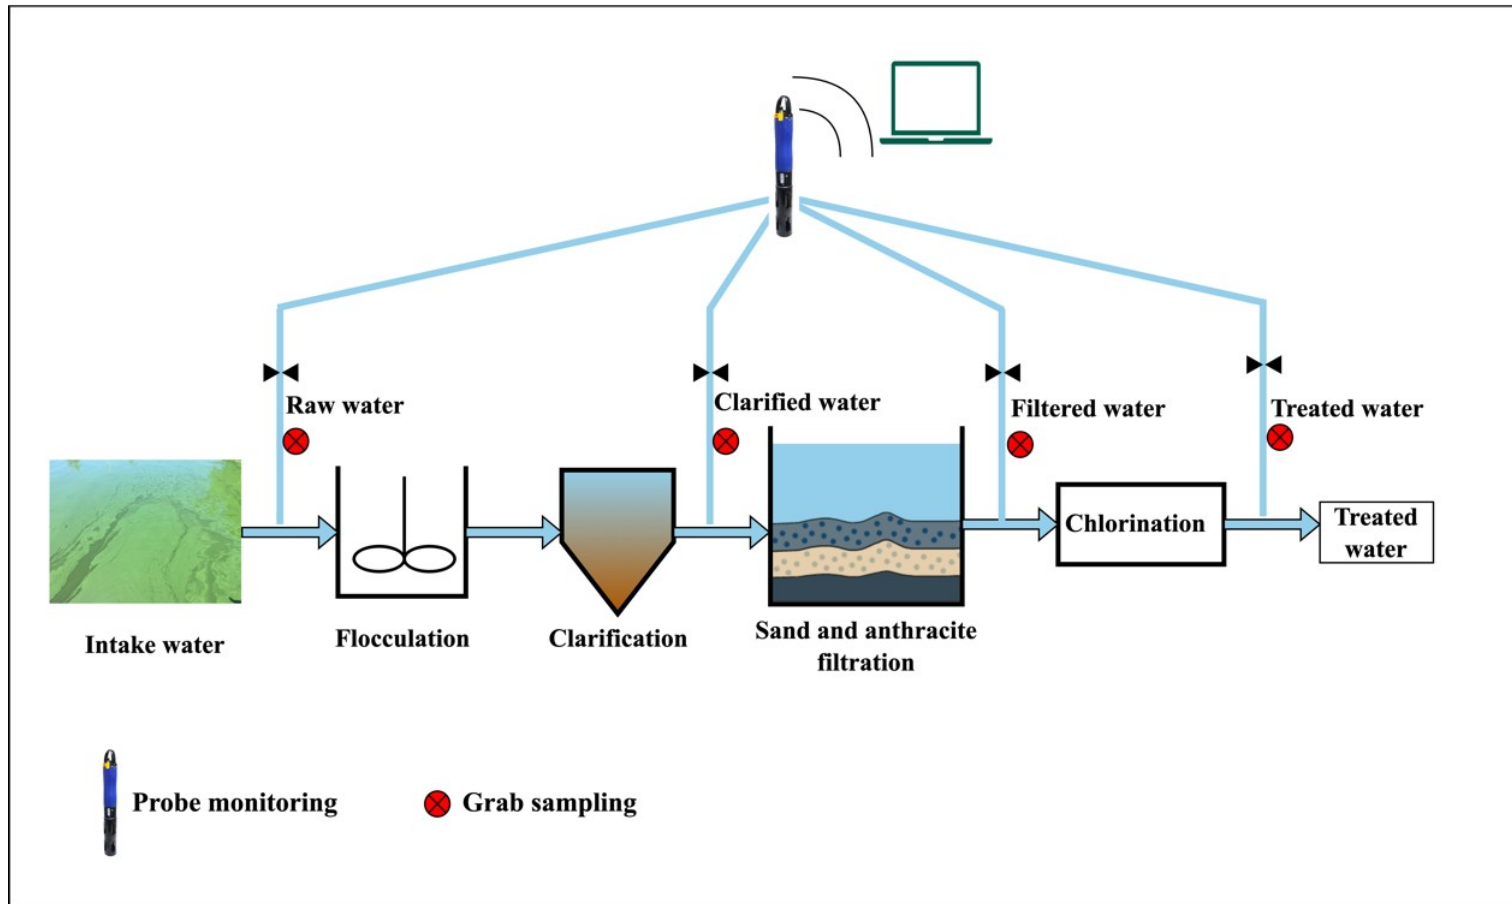

Figure S1 Schematic of the treatment processes of the studied three DWTPs, grab sampling and probe monitoring locations. Note DWTP C also employs pre-chlorination before flocculation

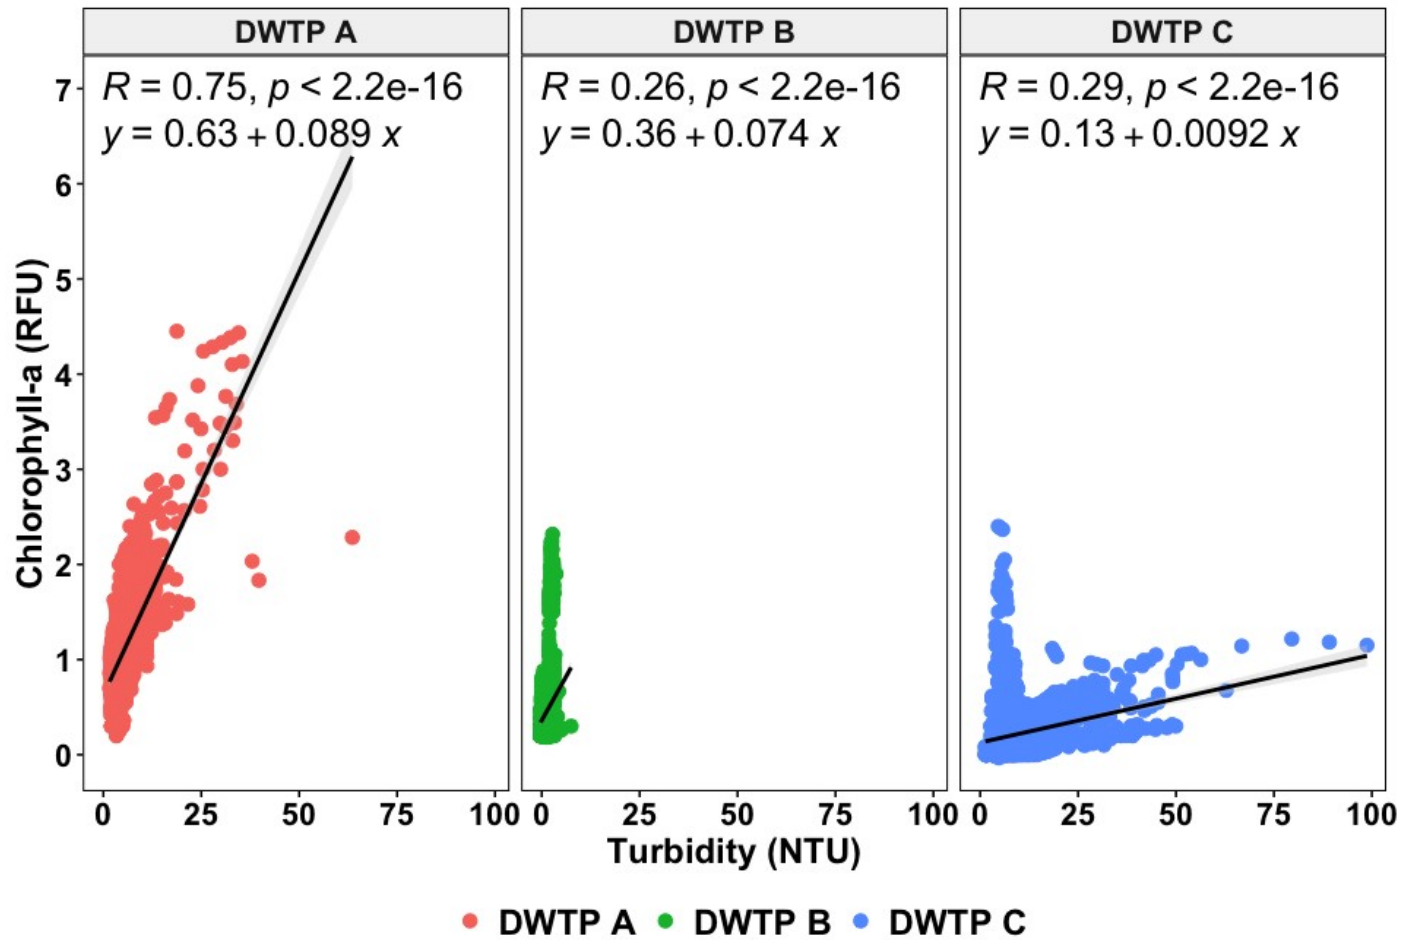

Figure S2 Turbidity (NTU) versus chlorophyll-a (RFU) of the source water of the three studied DWTPs

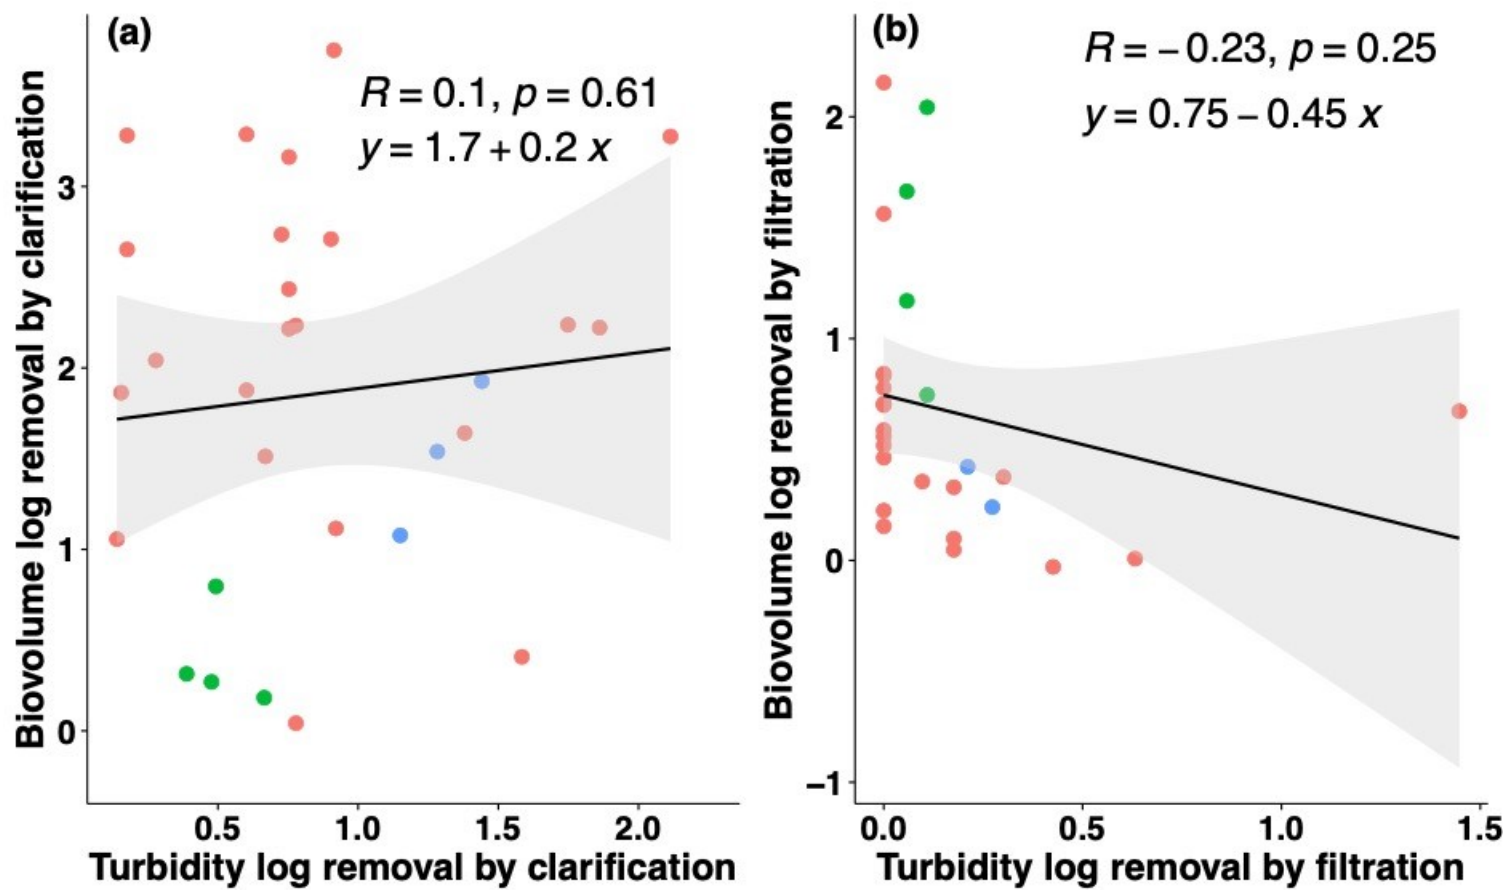

● DWTP A ● DWTP B ● DWTP C

Figure S3 Log removal of total cyanobacterial cell biovolume ( $\text{mm}^3/\text{L}$ ) versus log removal of turbidity (NTU) by (a) clarification, and (b) filtration

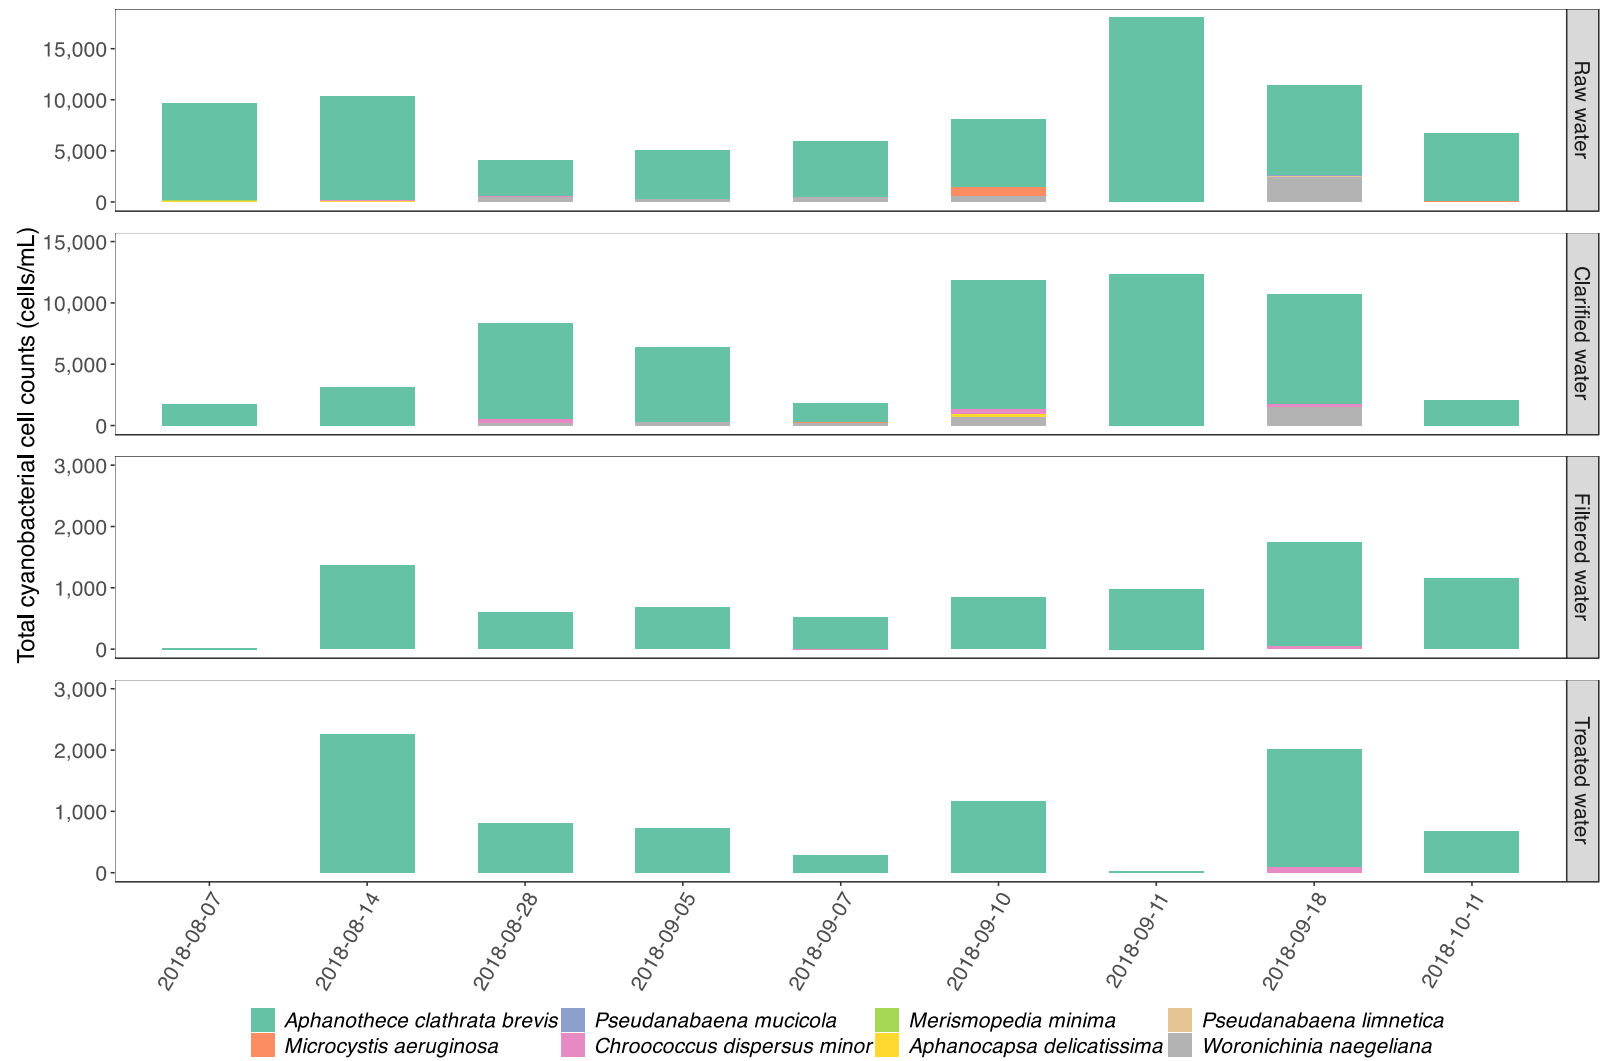

Figure S4 Cyanobacteria speciation evaluated as cell counts (cells/mL) in the raw, clarified, filtered, and treated water in DWTP B

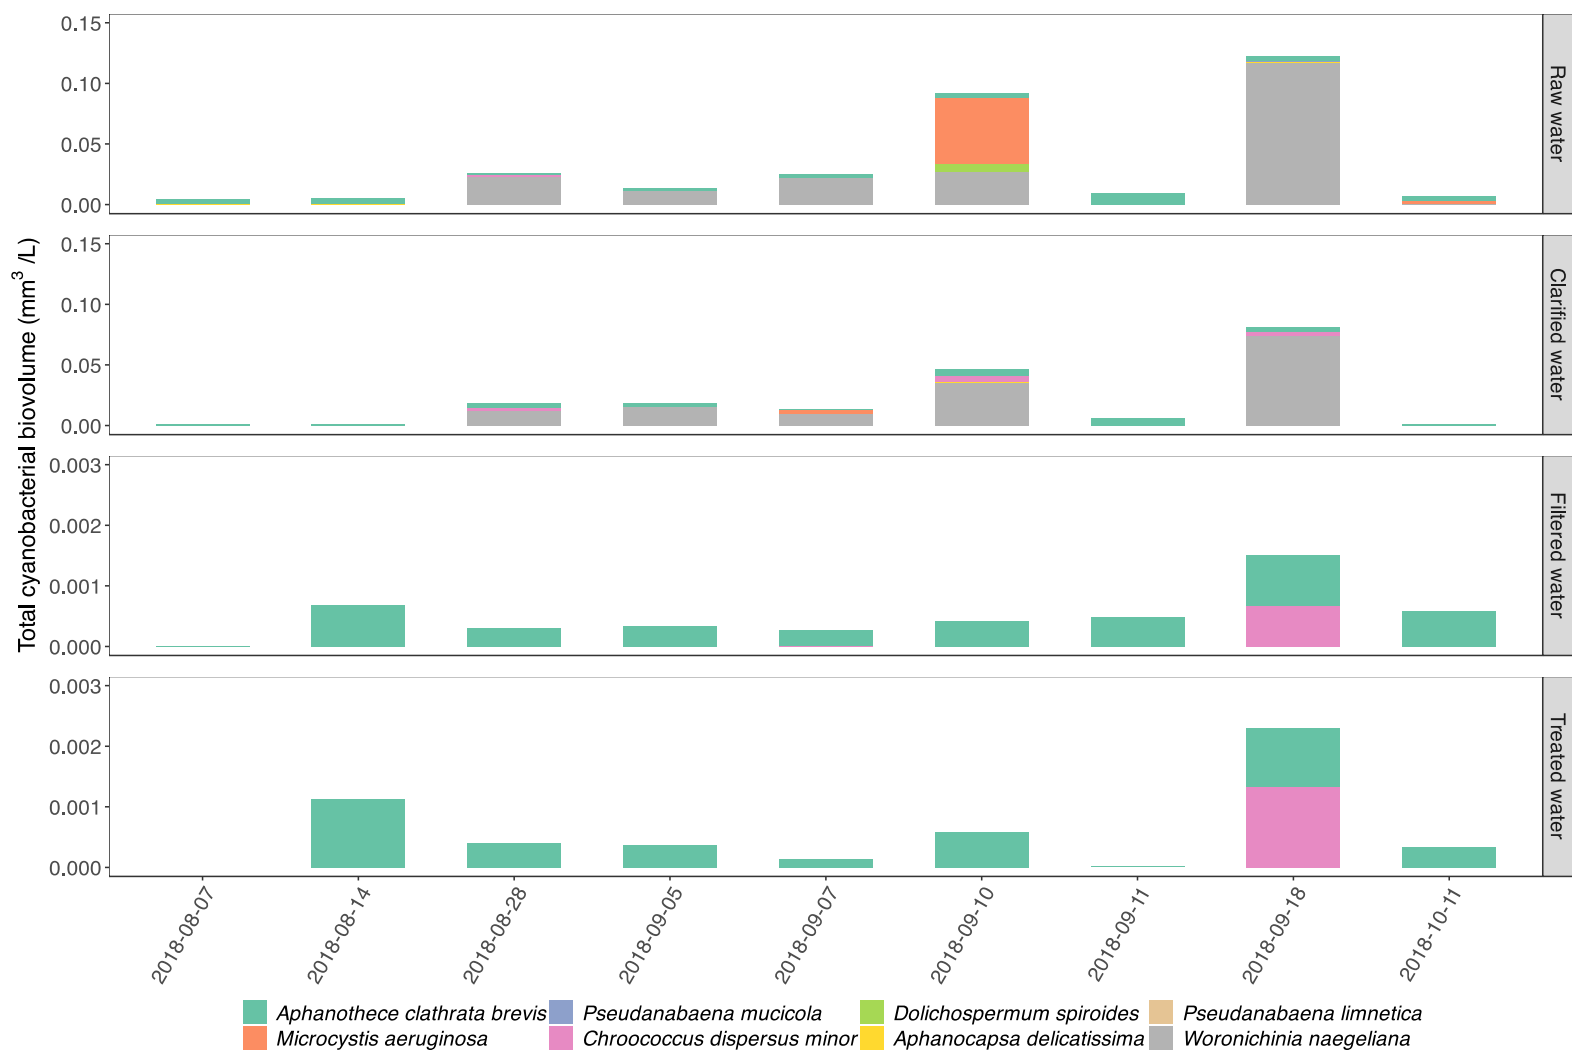

Figure S5 Cyanobacteria speciation evaluated as cell biovolumes (mm<sup>3</sup>/L) in the raw, clarified, filtered, and treated water in DWTP B

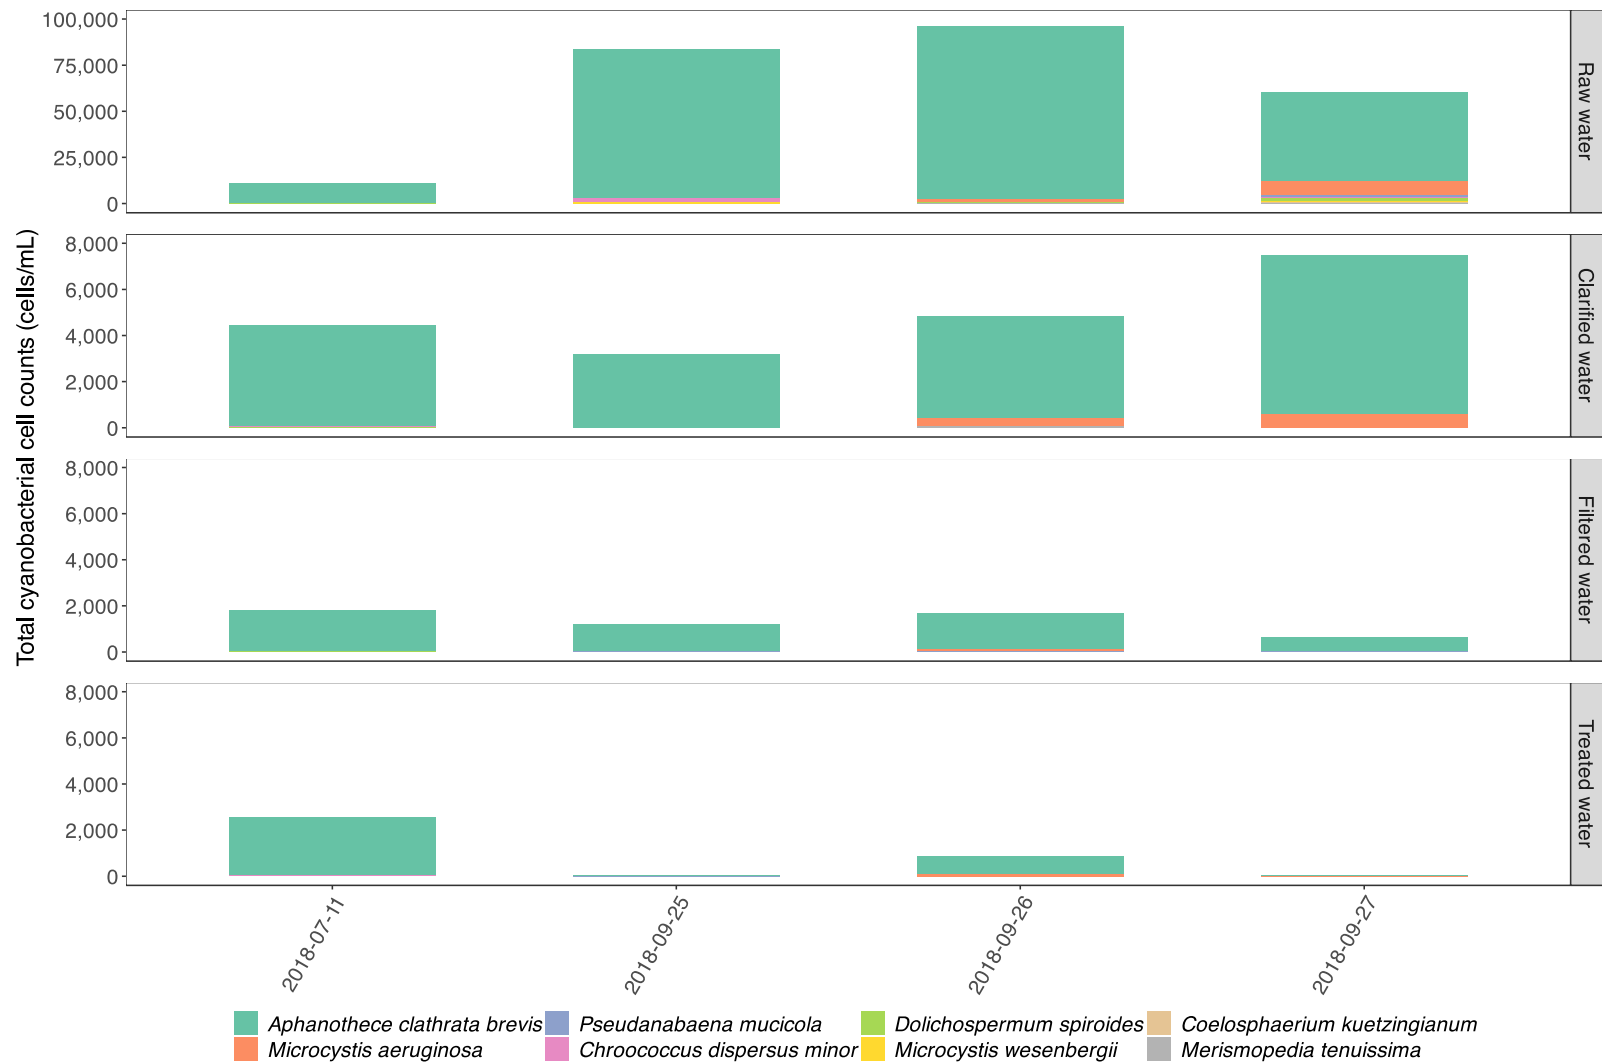

Figure S6 Cyanobacteria speciation evaluated as cell counts (cells/mL) in the raw, clarified, filtered, and treated water in DWTP C

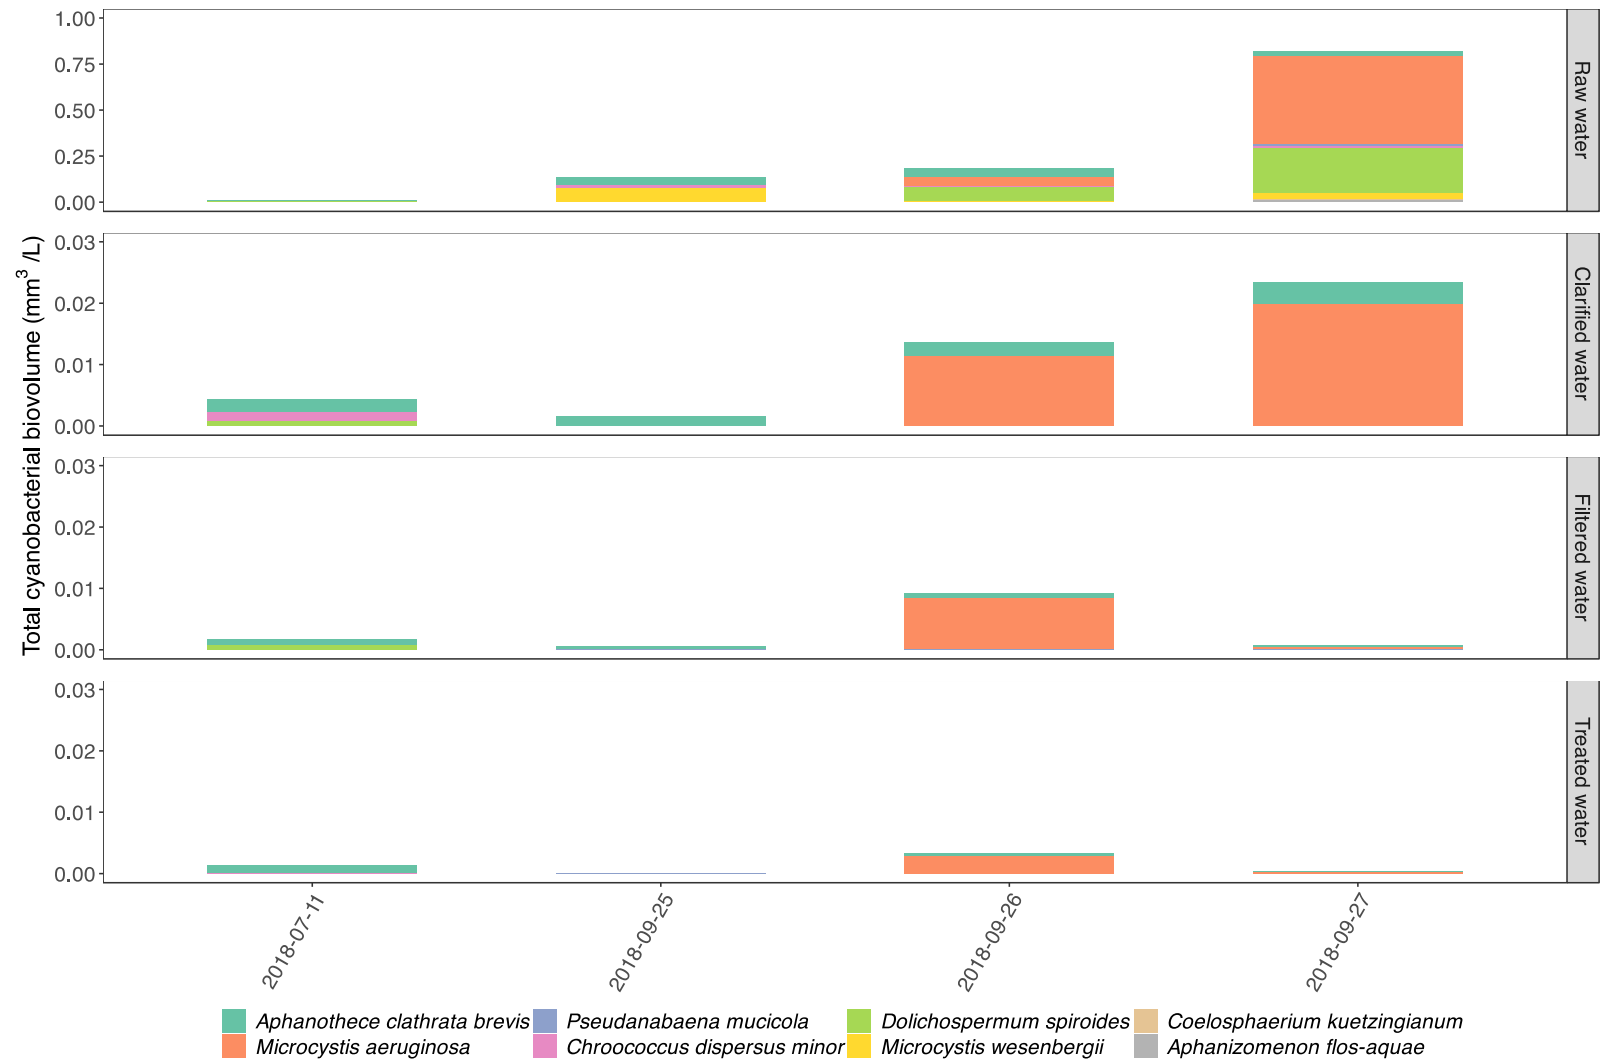

Figure S7 Cyanobacteria speciation evaluated as cell biovolumes (mm<sup>3</sup>/L) in the raw, clarified, filtered, and treated water in DWTP C



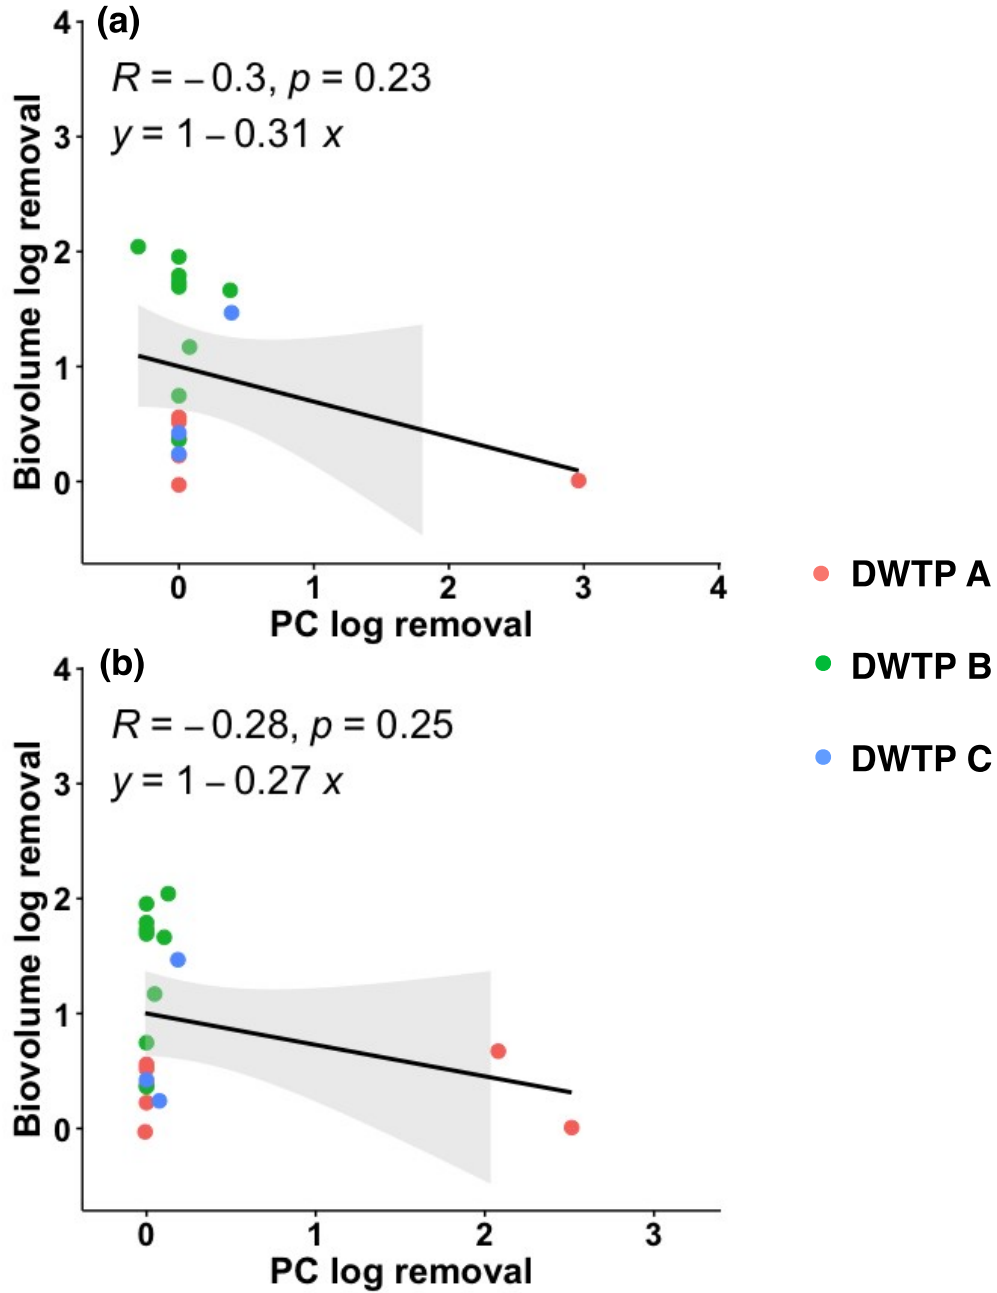

Figure S8 The filtration log removal efficacies evaluated by cell biovolumes versus evaluated by (a) 2-hour moving average of the phycocyanin readings, (b) daily mean phycocyanin readings. Paired data are from the samples of all DWTPs

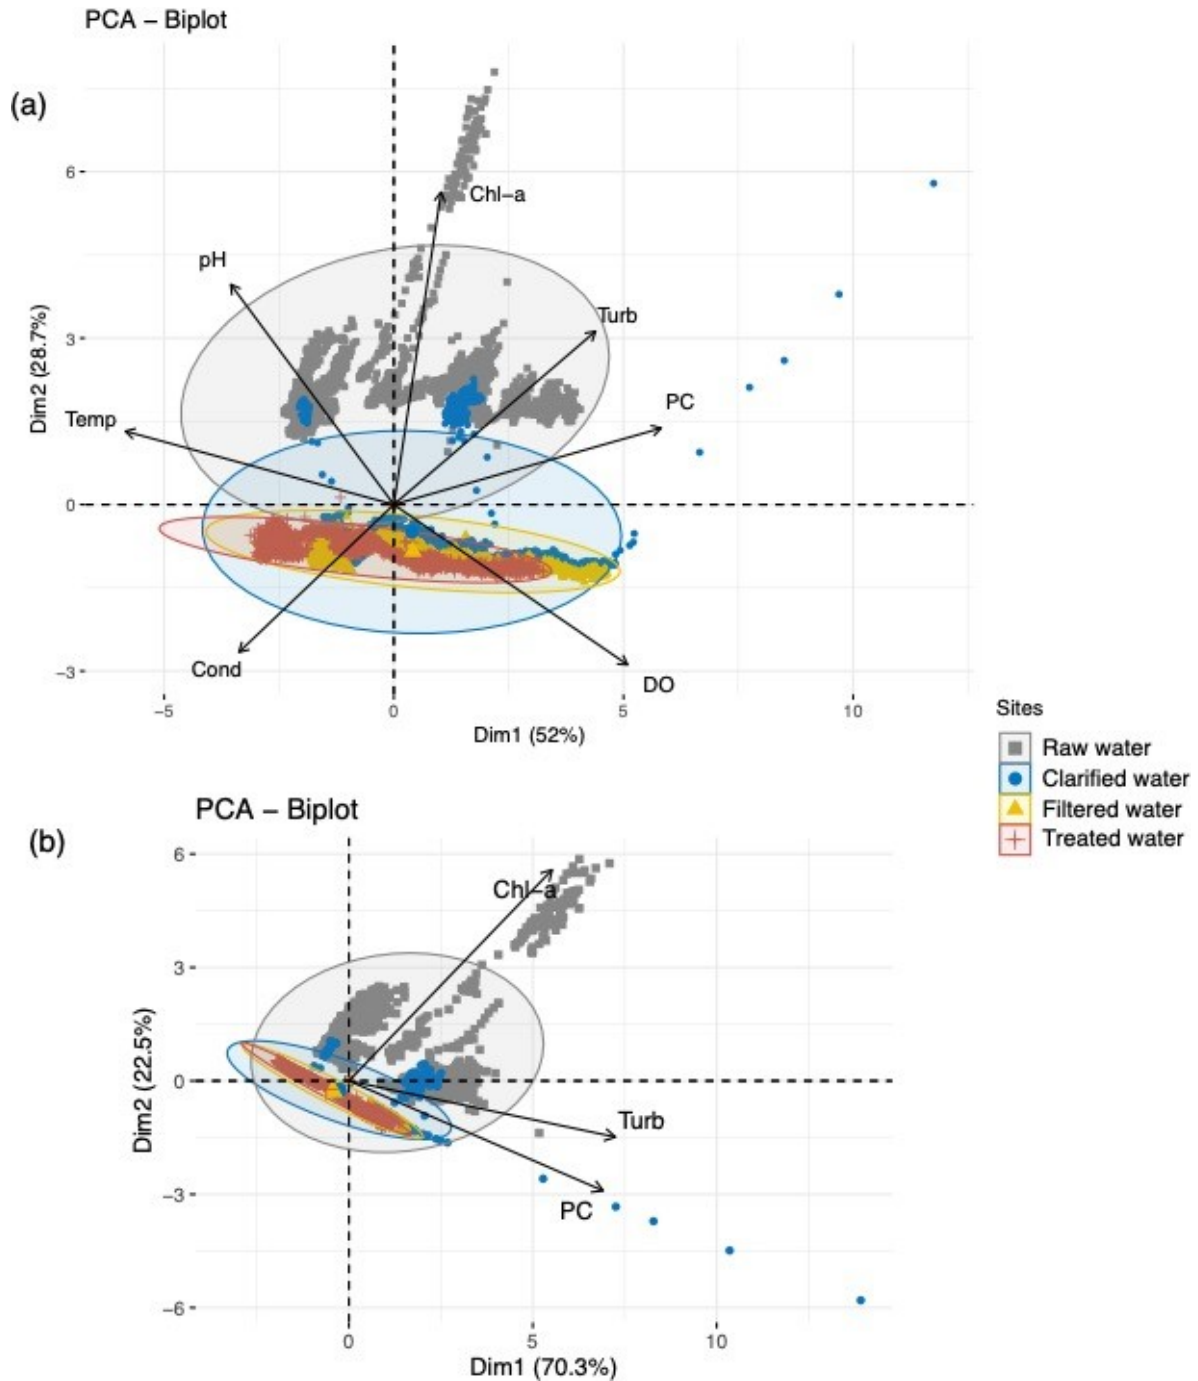

Figure S9 Principal component analysis (PCA) as *biplot* of the physio-chemical parameters of the raw, clarified, filtered, and treated water in DWTP B. Parameters are (a) PC = phycocyanin, Turb = turbidity, Chl-a = chlorophyll-a, DO = dissolved oxygen, Cond = conductivity, Temp = temperature and pH, (b) PC, Turb and Chl-a

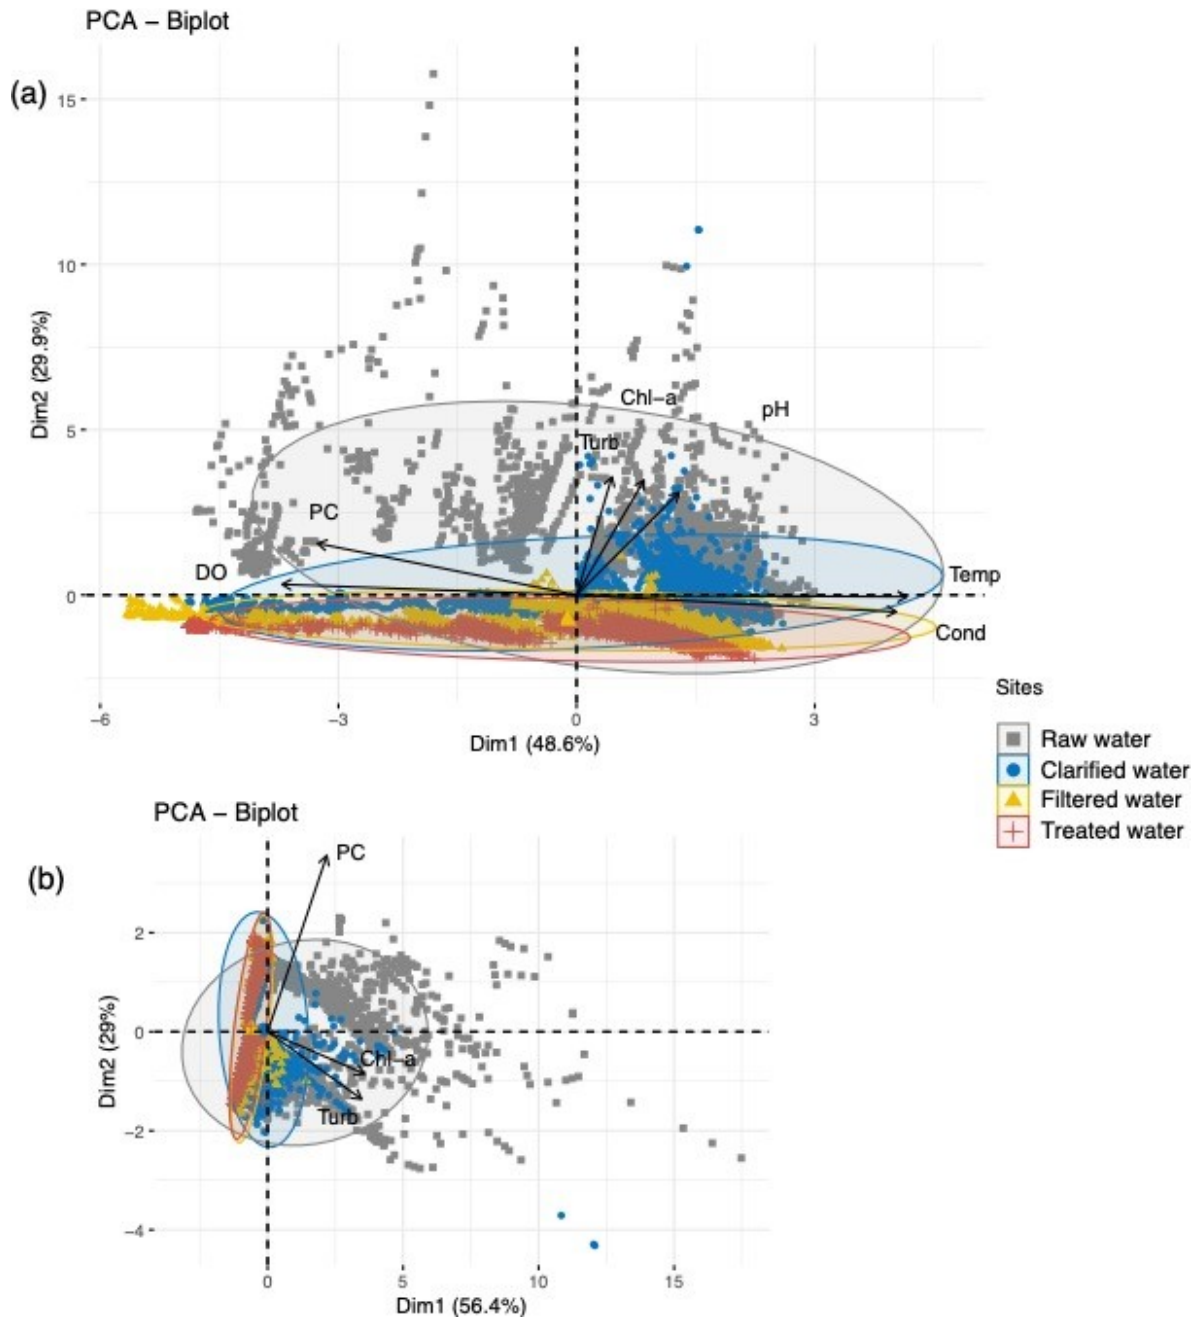

Figure S10 Principal component analysis (PCA) as *biplot* of the physio-chemical parameters of the raw, clarified, filtered, and treated water in DWTP C. Parameters are (a) PC = phycocyanin, Turb = turbidity, Chl-a = chlorophyll-a, DO = dissolved oxygen, Cond = conductivity, Temp = temperature and pH, (b) PC, Turb and Chl-a

Table S1 Species found in the source water of three studies DWTPs, arranged in descending order based on biovolumes (mm<sup>3</sup>/L)

| DWTP A                                      | DWTP B                                      | DWTP C                              |
|---------------------------------------------|---------------------------------------------|-------------------------------------|
| <i>Dolichospermum spiroides</i>             |                                             |                                     |
| <i>Microcystis aeruginosa</i>               |                                             |                                     |
| <i>Microcystis wesenbergii</i>              |                                             |                                     |
| <i>Dolichospermum circinalis</i>            | <i>Woronichinia naegeliana</i>              | <i>Microcystis aeruginosa</i>       |
| <i>Aphanothece clathrata brevis</i>         | <i>Microcystis aeruginosa</i>               | <i>Dolichospermum spiroides</i>     |
| <i>Chroococcus dispersus minor</i>          | <i>Aphanothece clathrata brevis</i>         | <i>Aphanothece clathrata brevis</i> |
| <i>Pseudanabaena mucicola</i>               | <i>Dolichospermum spiroides</i>             | <i>Microcystis wesenbergii</i>      |
| <i>Merismopedia punctata</i>                | <i>Chroococcus dispersus minor</i>          | <i>Chroococcus dispersus minor</i>  |
| <i>Dolichospermum solitaria planctonica</i> | <i>Pseudanabaena limnetica</i>              | <i>Coelosphaerium kuetzingianum</i> |
| <i>Chroococcus minimus</i>                  | <i>Pseudanabaena mucicola</i>               | <i>Pseudanabaena mucicola</i>       |
| <i>Aphanizomenon flos-aquae</i>             | <i>Aphanocapsa delicatissima</i>            | <i>Aphanizomenon flos-aquae</i>     |
| <i>Aphanocapsa delicatissima</i>            | <i>Gloeotrichia echinulata</i>              | <i>Dolichospermum flos-aquae</i>    |
| <i>Aphanizomenon issatschenkoi</i>          | <i>Aphanizomenon gracile</i>                | <i>Merismopedia punctata</i>        |
| <i>Pseudanabaena limnetica</i>              | <i>Dolichospermum solitaria planctonica</i> | <i>Merismopedia tenuissima</i>      |
| <i>Planktolyngbya sp cf</i>                 | <i>Planktolyngbya limnetica</i>             | <i>Aphanocapsa delicatissima</i>    |
| <i>Planktolyngbya limnetica</i>             | <i>Aphanothece smithii</i>                  | <i>Pseudanabaena limnetica</i>      |
| <i>Aphanocapsa holsatica</i>                | <i>Aphanocapsa planctonica</i>              | <i>Aphanocapsa holsatica</i>        |
| <i>Chroococcus prescottii</i>               | <i>Merismopedia minima</i>                  | <i>Cyanodictyon imperfectum</i>     |
| <i>Aphanocapsa planctonica</i>              | <i>Aphanocapsa holsatica</i>                |                                     |
| <i>Merismopedia tenuissima</i>              |                                             |                                     |
| <i>Merismopedia minima</i>                  |                                             |                                     |
| <i>Spirulina laxissima</i>                  |                                             |                                     |

Table S2 Log removal of the cyanobacterial species by clarification, filtration, and post-chlorination of DWTP A. The species were arranged in descending order based on their cell biovolume (mm<sup>3</sup>/L). Legend: NaN—impossible values resulting from division by zero, NA—not available

| Species                             | Clarification |     | Filtration |     | Post-chlorination |     |
|-------------------------------------|---------------|-----|------------|-----|-------------------|-----|
|                                     | mean          | SD  | mean       | SD  | mean              | SD  |
| <i>Dolichospermum spiroides</i>     | 2.6           | 0.6 | -0.3       | 0.3 | NaN               | NA  |
| <i>Microcystis aeruginosa</i>       | 3.0           | 0.7 | 0.6        | NA  | 0.0               | NA  |
| <i>Microcystis wesenbergii</i>      | NaN           | NA  | NaN        | NA  | NaN               | NA  |
| <i>Dolichospermum circinalis</i>    | NaN           | NA  | NaN        | NA  | NaN               | NA  |
| <i>Aphanothece clathrata brevis</i> | 1.2           | 0.5 | 0.2        | 0.3 | 0.0               | 0.2 |
| <i>Chroococcus dispersus minor</i>  | 0.6           | NA  | NaN        | NA  | NaN               | NA  |
| <i>Pseudanabaena mucicola</i>       | 1.0           | 1.1 | -0.1       | 0.6 | -0.1              | 0.3 |
| <i>Merismopedia punctata</i>        | NaN           | NA  | NaN        | NA  | NaN               | NA  |

Table S3 Log removal of the cyanobacterial species by clarification, filtration, and post-chlorination of DWTP B. The species were arranged in descending order based on their cell biovolume (mm<sup>3</sup>/L). Legend: NaN—impossible values resulting from division by zero, NA—not available

| Species                             | Clarification |     | Filtration |     | Post-chlorination |     |
|-------------------------------------|---------------|-----|------------|-----|-------------------|-----|
|                                     | mean          | SD  | mean       | SD  | mean              | SD  |
| <i>Woronichinia naegeliana</i>      | 0.1           | 0.2 | NaN        | NA  | NaN               | NA  |
| <i>Microcystis aeruginosa</i>       | NaN           | NA  | NaN        | NA  | NaN               | NA  |
| <i>Aphanothece clathrata brevis</i> | 0.2           | 0.4 | 0.9        | 0.5 | 0.2               | 0.6 |
| <i>Dolichospermum spiroides</i>     | NaN           | NA  | NaN        | NA  | NaN               | NA  |
| <i>Chroococcus dispersus minor</i>  | NaN           | NA  | NaN        | NA  | NaN               | NA  |
| <i>Pseudanabaena limnetica</i>      | NaN           | NA  | NaN        | NA  | NaN               | NA  |
| <i>Pseudanabaena mucicola</i>       | NaN           | NA  | NaN        | NA  | NaN               | NA  |
| <i>Aphanocapsa delicatissima</i>    | NaN           | NA  | NaN        | NA  | NaN               | NA  |

Table S4 Log removal of the cyanobacterial species by clarification, filtration, and post-chlorination of DWTP C. The species were arranged in descending order based on their cell biovolume (mm<sup>3</sup>/L). Legend: NaN—impossible values resulting from division by zero, NA—not available

| Species                             | Clarification |     | Filtration |     | Post-chlorination |     |
|-------------------------------------|---------------|-----|------------|-----|-------------------|-----|
|                                     | mean          | SD  | mean       | SD  | mean              | SD  |
| <i>Microcystis aeruginosa</i>       | 1.0           | 0.5 | 0.9        | 1.1 | 0.3               | 0.2 |
| <i>Dolichospermum spiroides</i>     | 0.7           | NA  | 0.1        | NA  | NaN               | NA  |
| <i>Aphanothece clathrata brevis</i> | 1.0           | 0.5 | 0.6        | 0.3 | 1.0               | 1.1 |
| <i>Microcystis wesenbergii</i>      | NaN           | NA  | NaN        | NA  | NaN               | NA  |
| <i>Chroococcus dispersus minor</i>  | NaN           | NA  | NaN        | NA  | NaN               | NA  |
| <i>Coelosphaerium kuetzingianum</i> | NaN           | NA  | NaN        | NA  | NaN               | NA  |
| <i>Pseudanabaena mucicola</i>       | NaN           | NA  | NaN        | NA  | NaN               | NA  |
| <i>Aphanizomenon flos-aquae</i>     | NaN           | NA  | NaN        | NA  | NaN               | NA  |

Table S5 Physio-chemical variables for the raw, clarified, filtered, and treated water of the studied three DWTPs

|        | Parameters | Units | Raw Water |       |       | Clarified Water |       |       | Filtered Water |       |       | Treated Water |       |       |     |
|--------|------------|-------|-----------|-------|-------|-----------------|-------|-------|----------------|-------|-------|---------------|-------|-------|-----|
|        |            |       | Mean      | Min   | Max   | Mean            | Min   | Max   | Mean           | Min   | Max   | Mean          | Min   | Max   |     |
| DWTP A | PC         | RFU   | 1.1       | 0.0   | 38.2  | 0.1             | 0.0   | 10.1  | 0.0            | 0.0   | 0.1   | 0.0           | 0.0   | 0.1   |     |
|        | Chl-a      | RFU   | 1.3       | 0.2   | 4.5   | 0.1             | 0.0   | 2.8   | 0.0            | 0.0   | 0.3   | 0.0           | 0.0   | 0.3   |     |
|        | DO         | mg/L  | 5.8       | 0.5   | 14.5  | 7.1             | 5.0   | 13.4  | 6.6            | 3.0   | 11.3  | 7.3           | 5.7   | 8.6   |     |
|        | TDS        | mg/L  | 91.0      | 84.0  | 106.0 | 106.8           | 86.3  | 132.9 | 107.6          | 98.5  | 133.2 | 116.9         | 102.0 | 149.7 |     |
|        | Temp       | °C    | 25.7      | 23.0  | 28.2  | 26.4            | 23.2  | 28.7  | 27.6           | 23.1  | 33.0  | 26.1          | 23.1  | 28.0  |     |
|        | Turb       | NTU   | 7.3       | 1.6   | 63.6  | 0.6             | 0.0   | 25.2  | 0.7            | 0.0   | 77.3  | 0.4           | 0.0   | 4.7   |     |
|        | Cond       | µS/cm | 141.8     | 132.0 | 165.5 | 168.6           | 135.3 | 210.4 | 173.8          | 153.0 | 226.0 | 183.9         | 153.0 | 237.3 |     |
|        | pH         |       |           | 7.3   | 6.5   | 9.4             | 6.6   | 6.2   | 9.3            | 6.5   | 6.2   | 7.1           | 6.9   | 6.4   | 8.1 |
|        | DWTP B     | PC    | RFU       | 0.1   | 0.0   | 0.4             | 0.1   | 0.0   | 0.4            | 0.1   | 0.0   | 0.4           | 0.1   | 0.0   | 0.3 |
| Chl-a  |            | RFU   | 0.5       | 0.2   | 2.3   | 0.0             | 0.0   | 0.5   | 0.0            | 0.0   | 0.1   | 0.0           | 0.0   | 0.1   |     |
| DO     |            | mg/L  | 6.9       | 5.0   | 10.8  | 8.2             | 5.8   | 11.8  | 8.5            | 6.3   | 11.8  | 8.1           | 6.7   | 11.3  |     |
| TDS    |            | mg/L  | 110.3     | 98.8  | 126.7 | 119.8           | 105.0 | 135.2 | 125.0          | 115.0 | 139.3 | 153.4         | 140.9 | 167.0 |     |
| Temp   |            | °C    | 22.8      | 12.8  | 27.8  | 21.0            | 9.6   | 26.1  | 20.6           | 9.5   | 26.1  | 21.9          | 12.4  | 26.5  |     |
| Turb   |            | NTU   | 1.3       | 0.0   | 7.5   | 0.4             | 0.0   | 20.2  | 0.2            | 0.0   | 1.0   | 0.2           | 0.0   | 2.0   |     |
| Cond   |            | µS/cm | 163.5     | 141.8 | 175.5 | 169.2           | 143.4 | 182.4 | 175.1          | 146.2 | 205.0 | 221.6         | 182.0 | 243.1 |     |
| pH     |            |       | 7.1       | 6.1   | 8.1   | 5.5             | 4.6   | 7.9   | 5.3            | 4.6   | 6.5   | 6.4           | 5.4   | 7.9   |     |
| DWTP C | PC         | RFU   | 0.0       | 0.0   | 0.3   | 0.0             | 0.0   | 0.1   | 0.0            | 0.0   | 0.1   | 0.0           | 0.1   | 0.1   |     |
|        | Chl-a      | RFU   | 0.2       | 0.0   | 2.4   | 0.0             | 0.0   | 1.1   | 0.0            | 0.0   | 0.2   | 0.0           | 0.1   | 0.1   |     |
|        | DO         | mg/L  | 8.5       | 3.9   | 11.1  | 8.6             | 5.0   | 11.2  | 8.9            | 5.1   | 13.7  | 8.6           | 11.2  | 11.2  |     |
|        | TDS        | mg/L  | 153.6     | 145.0 | 165.0 | 155.0           | 146.3 | 166.0 | 156.1          | 148.0 | 166.0 | 156.6         | 166.0 | 166.0 |     |
|        | Temp       | °C    | 22.4      | 12.0  | 26.4  | 21.9            | 11.3  | 26.0  | 22.1           | 11.7  | 26.0  | 21.6          | 25.6  | 25.6  |     |
|        | Turb       | NTU   | 9.7       | 1.3   | 98.8  | 3.0             | 0.0   | 78.3  | 1.0            | 0.0   | 15.9  | 0.5           | 8.1   | 8.1   |     |
|        | Cond       | µS/cm | 224.6     | 172.3 | 253.0 | 224.5           | 173.3 | 252.0 | 226.7          | 176.7 | 253.8 | 225.4         | 252.0 | 252.0 |     |
|        | pH         |       |           | 8.4   | 7.8   | 8.9             | 8.2   | 7.7   | 8.6            | 7.9   | 7.5   | 8.2           | 7.7   | 7.9   | 7.9 |



Table S6 Alert level frames, standards and guideline values of countries and regions for cyanobacteria and cyanotoxin in drinking water supplies

| Cell counts and/or cell biovolumes guidelines                                                                                                                                                                                  | Cyanotoxin guidelines (value in µg/L)                                                                                                                                                                                                                                                                                                                                                                                                                                                                                                                                                  | References                                                                    |
|--------------------------------------------------------------------------------------------------------------------------------------------------------------------------------------------------------------------------------|----------------------------------------------------------------------------------------------------------------------------------------------------------------------------------------------------------------------------------------------------------------------------------------------------------------------------------------------------------------------------------------------------------------------------------------------------------------------------------------------------------------------------------------------------------------------------------------|-------------------------------------------------------------------------------|
| <b>WHO</b>                                                                                                                                                                                                                     |                                                                                                                                                                                                                                                                                                                                                                                                                                                                                                                                                                                        |                                                                               |
| Vigilance Level in raw water:<br>≥ 10 colony/mL or ≥ 50 filaments/mL<br>Alert level 1 in raw water:<br>≥ 0.3 mm <sup>3</sup> /L total CB biovolume<br>Alert Level 2 in raw water:<br>≥ 4 mm <sup>3</sup> /L total CB biovolume | Alert level 1 in raw water:<br>Microcystin: 1, or Cylindrospermopsin: 0.7, or Anatoxin: 3, or Saxitoxins: 0.3<br>Alert level 2 in raw water:<br>Microcystin: 12, or Cylindrospermopsin: 3, or Anatoxin: 30, or Saxitoxins: 3                                                                                                                                                                                                                                                                                                                                                           | <a href="#">(Chorus et al., 2021b)</a>                                        |
| <b>USEPA</b>                                                                                                                                                                                                                   |                                                                                                                                                                                                                                                                                                                                                                                                                                                                                                                                                                                        |                                                                               |
| Not specified                                                                                                                                                                                                                  | Microcystin:<br>Bottle-fed infants and pre-school children: 0.3<br>School-age children and adults: 1.6<br>Cylindrospermopsin:<br>Bottle-fed infants and pre-school children: 0.7<br>School-age children and adults: 3.0                                                                                                                                                                                                                                                                                                                                                                | <a href="#">(United States Environmental Protection Agency (USEPA), 2015)</a> |
| <b>Ohio EPA</b>                                                                                                                                                                                                                |                                                                                                                                                                                                                                                                                                                                                                                                                                                                                                                                                                                        |                                                                               |
| Not specified                                                                                                                                                                                                                  | Microcystins:<br>Do not drink for children under 6 and sensitive populations: 0.3<br>Do not drink for children 6 and older and adults: 1.6<br>Cylindrospermopsin:<br>Do not drink for children under 6 and sensitive populations: 0.7<br>Do not drink for children 6 and older and adults: 3.0<br>Anatoxin-a:<br>Do not drink for children under 6 and sensitive populations: 0.3<br>Do not drink for children 6 and older and adults: 1.6<br>Saxitoxins:<br>Do not drink for children under 6 and sensitive populations: 0.3<br>Do not drink for children 6 and older and adults: 1.6 | <a href="#">(Ohio EPA, 2022)</a>                                              |

| Cell counts and/or cell biovolume guidelines                                                                                                                                                                                                                                                                                                                    | Cyanotoxin guidelines (value in µg/L)                                        | References                                                           |
|-----------------------------------------------------------------------------------------------------------------------------------------------------------------------------------------------------------------------------------------------------------------------------------------------------------------------------------------------------------------|------------------------------------------------------------------------------|----------------------------------------------------------------------|
| <b>Australia—NHMRC</b>                                                                                                                                                                                                                                                                                                                                          |                                                                              |                                                                      |
| Initial notification in raw water:<br>≥ 4500 cells/mL (0.2 mm <sup>3</sup> /L) <i>Cylindrospermopsis raciborskii</i><br>or ≥ 2000 cells/mL (0.2 mm <sup>3</sup> /L) <i>Microcystis aeruginosa</i><br>or ≥ 12,000 cells/ mL (2.7 mm <sup>3</sup> /L) <i>Nodularia spumigena</i><br>or ≥ 6000 cells/ mL (1.5 mm <sup>3</sup> /L) <i>Dolichospermum circinalis</i> | Cylindrospermopsin: 1<br>Microcystin: 1.3<br>Saxitoxins: 3<br>Nodularin: 1.3 | <a href="#">(NHMRC, 2022)</a>                                        |
| Alert in raw water:<br>≥ 15,500 cells/mL (0.6 mm <sup>3</sup> /L) <i>Cylindrospermopsis raciborskii</i><br>or ≥ 6500 cells/mL (0.6 mm <sup>3</sup> /L) <i>Microcystis aeruginosa</i><br>or ≥ 40,000 cells/ mL (9.1 mm <sup>3</sup> /L) <i>Nodularia spumigena</i><br>or ≥ 20,000 cells/ mL (5 mm <sup>3</sup> /L) <i>Dolichospermum circinalis</i>              |                                                                              |                                                                      |
| <b>New Zealand Ministry of Health</b>                                                                                                                                                                                                                                                                                                                           |                                                                              |                                                                      |
| Vigilance Level in raw water: ≥ 50 cells/mL (excluding picocyanobacteria).                                                                                                                                                                                                                                                                                      |                                                                              | <a href="#">(Ministry of Health, 2020; Ministry of Health, 2022)</a> |
| Alert level 1 in raw water: ≥ 75 cells/mL for potential cylindrospermopsin producers<br>or ≥ 100 cells/mL for potential microcystin / nodularin producers<br>or ≥ 300 cells/mL for potential saxitoxin producers<br>or ≥ 750 cells/mL for potential anatoxin producers                                                                                          |                                                                              |                                                                      |
| Alert Level 2 (toxin concentrations exceed their maximum acceptable value):<br>Microcystin: 1, Cylindrospermopsin: 0.8, Anatoxins: 6, Saxitoxins: 3, Nodularin: 1                                                                                                                                                                                               |                                                                              |                                                                      |
| <b>Canada Health Canada</b>                                                                                                                                                                                                                                                                                                                                     |                                                                              |                                                                      |
| Not specified                                                                                                                                                                                                                                                                                                                                                   | Microcystin in drinking water: 1.5                                           | <a href="#">(Health Canada, 2021)</a>                                |
| <b>MELCC Province of Quebec, Canada</b>                                                                                                                                                                                                                                                                                                                         |                                                                              |                                                                      |
| Water intake alert level:<br>≥ 10,000 cells/mL cyanobacteria<br>Water body alert level:<br>≥ 20,000 cells/mL cyanobacteria                                                                                                                                                                                                                                      | Microcystin in drinking water: 1.5                                           | <a href="#">(Ellis, 2009; Government of Québec, 2022)</a>            |

Table S7 Comparison of equivalent phycocyanin RFU to WHO alert levels

| R <sup>2</sup> value                                                    | Equation<br>Y: biovolume (mm <sup>3</sup> /L)<br>X: phycocyanin (RFU)                           | Equivalent RFU to WHO 2021 Alert levels   |                                         | Probe model | Scale of study (dominant species)            | Reference                                   |
|-------------------------------------------------------------------------|-------------------------------------------------------------------------------------------------|-------------------------------------------|-----------------------------------------|-------------|----------------------------------------------|---------------------------------------------|
|                                                                         |                                                                                                 | Alert level 1<br>≥ 0.3 mm <sup>3</sup> /L | Alert level 2<br>≥ 4 mm <sup>3</sup> /L |             |                                              |                                             |
| R <sup>2</sup> = 0.53                                                   | Y = 3.8X + 0.0057                                                                               | 0.1 RFU                                   | 1.1 RFU                                 | YSI EXO2    | Field<br>( <i>Dolichospermum spiroides</i> ) | ( <a href="#">Ma et al., 2023</a> )         |
| R <sup>2</sup> = 0.46                                                   | Y = 1.16X - 1.78                                                                                | 1.8 RFU                                   | 5.0 RFU                                 | YSI 6600    | Field<br>( <i>Microcystis</i> spp.)          | ( <a href="#">McQuaid et al., 2011</a> )    |
| R <sup>2</sup> ≥ 0.94                                                   | Y = 1.1X<br>Y = 3.8X                                                                            | 0.3 RFU<br>0.1 RFU                        | 3.6 RFU<br>1.1 RFU                      | YSI EXO2    | Lab<br>(2 strains of <i>M. aeruginosa</i> )  | ( <a href="#">Choo et al., 2018</a> )       |
| R <sup>2</sup> = 0.73                                                   | Y = 0.0564X - 0.0025                                                                            | 5.4 RFU                                   | 70.9 RFU                                | YSI EXO2    | Field<br>( <i>Microcystis</i> sp.)           | ( <a href="#">Almuhtaram et al., 2018</a> ) |
| R <sup>2</sup> = 0.999                                                  | Y = 0.5X                                                                                        | 0.6 RFU                                   | 8.0 RFU                                 | YSI 6600    | Lab<br>( <i>M. aeruginosa</i> )              | ( <a href="#">Zamyadi et al., 2012</a> )    |
| R <sup>2</sup> = 0.77<br>R <sup>2</sup> = 0.72<br>R <sup>2</sup> = 0.19 | Log Y = 2.0446 log X - 0.3592<br>Log Y = 1.8458 log X - 0.2318<br>Log Y = 0.6743 log X + 0.3804 | 0.8 RFU<br>0.7 RFU<br>0.1 RFU             | 3.0 RFU<br>2.8 RFU<br>2.1 RFU           | YSI EXO2    | 3 field locations<br>(mixed species)         | ( <a href="#">Bowling et al., 2016</a> )    |
| R <sup>2</sup> = 0.70                                                   | Y = 0.068X                                                                                      | 4.4 RFU                                   | 58.8 RFU                                | YSI EXO2    | Field<br>( <i>Pseudanabaena</i> sp.)         | ( <a href="#">Zamyadi et al., 2016</a> )    |
| 0.71 ≤ R <sup>2</sup> ≤ 0.81                                            | No equation provided                                                                            | NA                                        | NA                                      | YSI EXO2    | Lab<br>(4 species)                           | ( <a href="#">Bertone et al., 2019</a> )    |

## References

- Almuhtaram, H., Cui, Y., Zamyadi, A. and Hofmann, R. 2018. Cyanotoxins and cyanobacteria cell accumulations in drinking water treatment plants with a low risk of bloom formation at the source. *Toxins* 10, 430.
- Bertone, E., Chuang, A., Burford, M.A. and Hamilton, D.P. 2019. In-situ fluorescence monitoring of cyanobacteria: Laboratory-based quantification of species-specific measurement accuracy. *Harmful Algae* 87, 101625.
- Bowling, L.C., Zamyadi, A. and Henderson, R.K. 2016. Assessment of in situ fluorometry to measure cyanobacterial presence in water bodies with diverse cyanobacterial populations. *Water Research* 105, 22-33.
- Choo, F., Zamyadi, A., Newton, K., Newcombe, G., Bowling, L., Stuetzb, R. and Henderson, R.K. 2018. Performance evaluation of in situ fluorometers for real-time cyanobacterial monitoring. *H<sub>2</sub> Open Journal* 1(1), 26-46.
- Chorus, I. and Welker, M. (2021) *Toxic cyanobacteria in water : A guide to their public health consequences, monitoring and management*, Taylor & Francis.
- Ellis, D. 2009 *Guide d'intervention pour les propriétaires, les exploitants ou les concepteurs de stations de production d'eau potable municipales aux prises avec une problématique de fleurs d'eau de cyanobactéries*, p. 51, Ministère du Développement durable, Environnement et Parcs.
- Government of Québec 2022 Chapter Q-2, r. 40. Regulation respecting the quality of drinking water, *Environmental quality act*, p. 68.
- Health Canada 2021 *Guidelines for Canadian drinking water quality: Guideline technical document. Cyanobacterial toxins*, Federal-Provincial-Territorial Committee on Drinking Water, Ottawa, ON, CANADA.
- Ma, L., Guerra Maldonado, J.F., Zamyadi, A., Dorner, S. and Prévost, M. 2023. Use of in situ phycocyanin probe system to prevent the cyanobacterial breakthrough and cyanotoxin accumulation in drinking water treatment plants [Manuscript submitted for publication].
- McQuaid, N., Zamyadi, A., Prévost, M., Bird, D.F. and Dorner, S. 2011. Use of in vivo phycocyanin fluorescence to monitor potential microcystin-producing cyanobacterial biovolume in a drinking water source. *Journal of Environmental Monitoring* 13(2), 455-463.
- Ministry of Health (2020) *Guidelines for drinking-water quality management for New Zealand*, p. 59.
- Ministry of Health 2022 *Drinking-water standards for New Zealand*, p. 7, Government of New Zealand, Wellington, New Zealand.
- NHMRC 2022 *Australian drinking water guidelines 6. National Water Quality Management Strategy.*, Commonwealth of Australia, Canberra.
- Ohio EPA 2022 *Public water system. Harmful algal bloom. Response strategy*, p. 66.
- United States Environmental Protection Agency (USEPA) 2015 *Recommendations for public water systems to manage cyanotoxins in drinking water*, p. 70.
- Zamyadi, A., Henderson, R.K., Stuetz, R., Newcombe, G., Newtown, K. and Gladman, B. 2016. Cyanobacterial management in full-scale water treatment and recycling processes: Reactive dosing following intensive monitoring. *Environmental Science: Water Research & Technology* 2(2), 362-375.
- Zamyadi, A., McQuaid, N., Dorner, S., Bird, D.F., Burch, M., Baker, P., Hobson, P. and Prévost, M. 2012. Cyanobacterial detection using in vivo fluorescence probes: Managing interferences for improved decision-making. *Journal American Water Works Association* 104(8), E466-E479.
